# Supplementary material for: Effects of multiple-dose intranasal oxytocin administration on social responsiveness in children with autism: a randomized, placebo-controlled trial
Source: Springer Nature journal article supplement (doi:10.1186/s13229-023-00546-5), 2023-04-20
Supplement: MOESM1 [file 25264542]

## Supplementary Information

### Effects of multiple-dose intranasal oxytocin administration on social responsiveness in children with autism: A randomized, placebo-controlled trial

#### Authors

*Nicky Daniels, Matthijs Moerkerke, Jean Steyaert, Annelies Bamps, Edward Debbaut, Jellina Prinsen, Tiffany Tang, Stephanie Van de Donck, Bart Boets, Kaat Alaerts*

## Supplementary Methods

**Rationale for adopted trial design.** As outlined, all outcomes were assessed five times: (i) at baseline (T0), (ii) immediately after the four-week double-blind nasal spray administration period (phase I – post, T1); (iii) at a follow-up session, four weeks after cessation of the double-blind nasal spray administration period (phase I - follow-up, T2); (iv) immediately after the four-week single-blind nasal spray administration period (phase II – post, T3); and (v) at a follow-up session four weeks after cessation of the single-blind nasal spray administration period (phase II - follow-up, T4) (see [Figure 1A](#) for a visualization of the trial design).

Generally, the double-blind, parallel trial design of phase I (with the T1 post and T2 follow-up) was similar to our prior OT trial with adults [1] allowing to examine the possibility of retention effects in the current pediatric sample.

After completion of the T2 follow-up session of Phase I, participants were further enrolled in the second ‘single-blind’ phase (phase II), during which all participants received the OT nasal spray for a course of four weeks. The cross-over of participants of the placebo-first group to the oxytocin nasal spray allowed all participants to receive the actual OT nasal spray during their trial participation and therefore, allowed obtaining assessments of OT-induced changes from all children participating in the trial. Importantly, obtaining outcome assessments from a larger total number of children receiving the OT nasal spray allowed performing more thorough examinations of possible variations in treatment responses due to moderator variables (see results).

Further, children who already received OT in the double-blind phase, were also given another four-week course of OT administration during the subsequent single-blind phase. A cross-over of this group to the placebo nasal spray was deemed suboptimal, considering recent notions of long-lasting retention effects upon multiple-dose oxytocin administration [1], which may have interfered with a true assessment of placebo nasal spray administration. Furthermore, allowing the oxytocin-first group to receive an additional four-week course of OT allowed an exploratory examination of potential augmenting effects upon receiving the nasal spray for a longer duration.

**COVID-19 related impact.** As indicated in the initial EudraCT trial registration, participants were recruited to participate in a larger project, also including physiological, neural, neurophysiological and biological assessments, for which a total sample size of 60 participants was planned (30 in each treatment arm). However, due to COVID-19 related health restrictions, all physiological, neural and neurophysiological data collections were temporarily halted, resulting in extensive loss of treatment follow-up data on these neural outcomes. Fortunately, for all participants already enrolled or scheduled to initiate the nasal spray administration, the collection of the behavioral data through questionnaires could still be continued during the COVID-19 lock-down periods. Nonetheless, to account for the extensive data loss on the neurophysiological assessments, and upon approval from the Ethical committee, recruitment was extended after the COVID-19 lock-downs, allowing to still obtain the initially planned sample size of 30 participants in each treatment arm on the neurophysiological assessments. As a result, the total sample size of participants in the trial (and for whom behavioral collections were performed) was increased from 60 to 80.

**Reference:** [1] Bernaerts S, Boets B, Bosmans G, Steyaert J, Alaerts K. Behavioral effects of multiple-dose oxytocin treatment in autism: A randomized, placebo-controlled trial with long-term follow-up. *Mol Autism*. 2020;11:6.

## Supplementary Table 1

### Full list of inclusion and exclusion criteria.

| Inclusion criteria                                                                                                                                                                 | Exclusion criteria                                                                                                                                                                                                                              |
|------------------------------------------------------------------------------------------------------------------------------------------------------------------------------------|-------------------------------------------------------------------------------------------------------------------------------------------------------------------------------------------------------------------------------------------------|
| Diagnosed with ASD by a multidisciplinary team of experienced clinicians as defined by the DSM-IV-TR or DSM-5-TR criteria (Diagnostic and Statistical Manual of Mental Disorders). | History of any neurological disorder (stroke, concussion, epilepsy etc).                                                                                                                                                                        |
| Age-range of 8 to 12 years old.                                                                                                                                                    | Significant hearing or vision impairments.                                                                                                                                                                                                      |
| Premenstrual girls (girls with onset of menstruation during the course of the trial are allowed to continue the treatment).                                                        | Active medical problems: unstable seizures, significant physical illness (e.g., serious liver, renal, or cardiac pathology).                                                                                                                    |
| Intelligence Quotient above 70 (either full-scaled IQ, verbal IQ or performance IQ).                                                                                               | Regular nasal obstruction or nosebleeds.                                                                                                                                                                                                        |
| Dutch native speaker.                                                                                                                                                              | Subjects who have had previous chronic treatment with oxytocin.                                                                                                                                                                                 |
| Stable background treatment during four weeks prior to screening.                                                                                                                  | Participation in another Clinical Trial.                                                                                                                                                                                                        |
| No planned changes in psychosocial interventions during the trial.                                                                                                                 | Known hypersensitivity to active substance or excipients in nasal sprays.                                                                                                                                                                       |
|                                                                                                                                                                                    | (Significant) change in background treatments.                                                                                                                                                                                                  |
|                                                                                                                                                                                    | For MR assessment: any contraindication to MRI research (pacemaker, implanted defibrillator, ear implant / a cochlear implant, insulin or implanted pump, a neurostimulator or VP shunt, any metallic object in the eyes (metallic fragments)*. |

\*As indicated in the registration at the European Clinical Trial Registry (EudraCT 2018-000769-35), behavioral data collections were part of a larger project assessing neurophysiology and biological outcomes.

## Supplementary Table 2

### Detailed information on medication use and co-occurring conditions for participants of the oxytocin and placebo treatment groups.

Current psychoactive medication use was defined as use within four weeks before study enrollment. Co-occurring conditions were screened through parent-report (with the explicit mentioning of examples in the screening interview including e.g., ADHD, depression, dyscalculia, dyslexia).

All participants had a stable background treatment for at least four weeks prior to the treatment allocation and changes in medication regime were screened and logged.

|                                | Oxytocin<br>(n = 38) |         | Placebo<br>(n = 39) |         | Pearson<br>Chi square | p-value |
|--------------------------------|----------------------|---------|---------------------|---------|-----------------------|---------|
|                                | no.                  | (%)     | no.                 | (%)     |                       |         |
| <b>Psychoactive Medication</b> |                      |         |                     |         |                       |         |
| Antianginal agents             | 1                    | (2.5%)  | 0                   | (0%)    | 1.04                  | 0.31    |
| Anticholinergic agent          | 3                    | (7.5%)  | 0                   | (0%)    | 3.20                  | 0.07    |
| Anti-depressants               | 3                    | (7.5%)  | 1                   | (2.5%)  | 1.11                  | 0.29    |
| Antipsychotics                 | 6                    | (15%)   | 7                   | (17.5%) | 0.06                  | 0.80    |
| Sleep Aids                     | 6                    | (15%)   | 12                  | (30%)   | 2.41                  | 0.12    |
| Stimulants                     | 11                   | (27.5%) | 9                   | (22.5%) | 0.34                  | 0.56    |
| <b>Other Medication</b>        |                      |         |                     |         |                       |         |
| Allergy and asthma medications | 3                    | (7.5%)  | 1                   | (2.5%)  | 1.11                  | 0.29    |
| Gastrointestinal medications   | 0                    | (0%)    | 2                   | (5%)    | 2.00                  | 0.16    |
| Nutritional Supplements        | 2                    | (5%)    | 4                   | (10%)   | 0.67                  | 0.41    |
| Statins                        | 1                    | (2.5%)  | 0                   | (0%)    | 1.04                  | 0.31    |
| <b>Co-occurring conditions</b> |                      |         |                     |         |                       |         |
| ADHD                           | 11                   | (28.9%) | 10                  | (25.6%) | 0.11                  | 0.74    |
| DCD                            | 3                    | (7.5%)  | 1                   | (2.5%)  | 1.11                  | 0.29    |
| Dyslexia                       | 2                    | (5%)    | 5                   | (12.5%) | 1.33                  | 0.25    |
| Dysorthography                 | 0                    | (0%)    | 1                   | (2.5%)  | 0.99                  | 0.32    |
| OCD                            | 1                    | (2.5%)  | 0                   | (0%)    | 1.04                  | 0.31    |

ADHD, Attention Deficit Hyperactivity Disorder; DCD, Developmental Coordination Disorder; OCD, Obsessive-Compulsive Disorder.

## Supplementary Table 3

### Side effect screening.

Participants (with the help of their parents) were asked to administer the nasal spray (oxytocin or placebo) daily for four consecutive weeks in phase I (double-blind phase) and another four weeks in phase II (single-blind extension phase). At the end of each week, parents were asked to report whether their child presented any of the listed (or other) side effects and to indicate the severity of the side effect (mild, moderate, or severe). Safety analyses included all participants that received the allocated intervention.

**Panel A** lists the proportion of oxytocin or placebo participants (%) that reported any mild, moderate or severe side effects (averaged across effects). P-values correspond to hypothesis tests for difference in proportions between the two treatment groups. Data printed in bold show p-values equal to or larger than 0.05.

**Panel B** lists, separately for each side effect, the proportion of oxytocin (OT) or placebo (PL) participants that reported the side effect (averaged across severity level: mild, moderate, severe).

**Panel C** lists any other incidental adverse event, spontaneously reported by the parents.

While on average, no group differences were evident in the total proportion of reported side effects, a group differences was observed in the proportion of participants who reported moderate side effects in the last week of administration, indicating that the participants of the oxytocin group reported a slightly higher number of moderate side effects during that week.

When examined separately for each side effect, a higher proportion of participants of the oxytocin group reported to experience a 'headache' or 'abdominal/stomach pain' during the third week of the phase I treatment. Also a higher proportion of participants of the placebo group were noted to experience a 'sore throat' and to feel 'more confident', compared to the oxytocin group, but only during the first week of the phase I treatment.

In the single-blind phase (phase II), no significant group differences were revealed, either in the total proportion of reported side effects (**Panel A**) or separately for each side effect (**Panel B**).

**Panel A**

**Phase I (double-blind)**

|                     | Oxytocin (%) |          |        | Placebo (%) |          |        | Group difference (p-value) |             |        |
|---------------------|--------------|----------|--------|-------------|----------|--------|----------------------------|-------------|--------|
|                     | Mild         | Moderate | Severe | Mild        | Moderate | Severe | Mild                       | Moderate    | Severe |
| <b>Week 1</b>       | 30.00        | 27.50    | 2.50   | 32.50       | 15.00    | 0.00   | 0.81                       | 0.17        | 0.31   |
| <b>Week 2</b>       | 37.50        | 25.00    | 2.50   | 22.50       | 17.50    | 0.00   | 0.14                       | 0.41        | 0.31   |
| <b>Week 3</b>       | 22.50        | 20.00    | 5.00   | 22.50       | 10.00    | 5.00   | 1.00                       | 0.21        | 1.00   |
| <b>Week 4</b>       | 35.00        | 20.00    | 2.50   | 30.00       | 5.00     | 2.50   | 0.63                       | <b>0.04</b> | 1.00   |
| <b>Across weeks</b> | 31.25        | 23.13    | 3.13   | 26.88       | 11.88    | 1.88   | 0.67                       | 0.19        | 0.72   |

**Phase II (single-blind)**

|                     | Oxytocin <sub>first</sub> (%) |          |        | Placebo <sub>first</sub> (%) |          |        | Group difference (p-value) |          |        |
|---------------------|-------------------------------|----------|--------|------------------------------|----------|--------|----------------------------|----------|--------|
|                     | Mild                          | Moderate | Severe | Mild                         | Moderate | Severe | Mild                       | Moderate | Severe |
| <b>Week 1</b>       | 34.21                         | 21.05    | 7.89   | 23.08                        | 23.08    | 10.26  | 0.28                       | 0.83     | 0.72   |
| <b>Week 2</b>       | 28.95                         | 23.68    | 13.16  | 17.95                        | 17.95    | 2.56   | 0.25                       | 0.54     | 0.08   |
| <b>Week 3</b>       | 23.68                         | 13.16    | 5.26   | 17.95                        | 7.69     | 2.56   | 0.54                       | 0.43     | 0.54   |
| <b>Week 4</b>       | 34.21                         | 26.32    | 2.63   | 35.90                        | 28.21    | 0.00   | 0.88                       | 0.85     | 0.31   |
| <b>Across weeks</b> | 30.26                         | 21.05    | 7.24   | 23.72                        | 19.23    | 3.85   | 0.52                       | 0.84     | 0.51   |

**Panel B**

**Phase I (double-blind)  
(OT n = 40; PL n = 40)**

|                                       | Week 1 |        |             | Week 2 |        |      | Week 3 |        |             | Week 4 |        |      |
|---------------------------------------|--------|--------|-------------|--------|--------|------|--------|--------|-------------|--------|--------|------|
|                                       | OT (%) | PL (%) | p           | OT (%) | PL (%) | p    | OT (%) | PL (%) | p           | OT (%) | PL (%) | p    |
| Headache                              | 10.00  | 12.50  | 0.72        | 7.50   | 7.50   | 1.00 | 12.50  | 0.00   | <b>0.02</b> | 5.00   | 2.50   | 0.56 |
| Drowsiness                            | 2.50   | 2.50   | 1.00        | 7.50   | 5.00   | 0.64 | 7.50   | 0.00   | 0.08        | 2.50   | 0.00   | 0.31 |
| Dizziness                             | 7.50   | 2.50   | 0.30        | 2.50   | 2.50   | 1.00 | 7.50   | 0.00   | 0.08        | 2.50   | 0.00   | 0.31 |
| Fainting                              | 0.00   | 0.00   | 1.00        | 0.00   | 0.00   | 1.00 | 2.50   | 0.00   | 0.31        | 0.00   | 0.00   | 1.00 |
| Changes in heart rate or palpitations | 0.00   | 0.00   | 1.00        | 2.50   | 0.00   | 0.31 | 2.50   | 0.00   | 0.31        | 0.00   | 0.00   | 1.00 |
| Shortness of breath                   | 0.00   | 0.00   | 1.00        | 0.00   | 0.00   | 1.00 | 0.00   | 2.50   | 0.31        | 0.00   | 0.00   | 1.00 |
| Fever                                 | 0.00   | 2.50   | 0.31        | 0.00   | 0.00   | 1.00 | 0.00   | 0.00   | 1.00        | 2.50   | 0.00   | 0.31 |
| Sore throat                           | 0.00   | 12.50  | <b>0.02</b> | 5.00   | 7.50   | 0.64 | 5.00   | 0.00   | 0.15        | 0.00   | 0.00   | 1.00 |
| Dry throat/dry mouth                  | 0.00   | 5.00   | 0.15        | 0.00   | 0.00   | 1.00 | 2.50   | 0.00   | 0.31        | 5.00   | 0.00   | 0.15 |
| Hoarseness                            | 0.00   | 5.00   | 0.15        | 0.00   | 2.50   | 0.31 | 0.00   | 0.00   | 1.00        | 2.50   | 0.00   | 0.31 |
| Coughing                              | 5.00   | 5.00   | 1.00        | 2.50   | 2.50   | 1.00 | 2.50   | 0.00   | 0.31        | 5.00   | 0.00   | 0.15 |
| Coughing up mucus                     | 0.00   | 0.00   | 1.00        | 0.00   | 0.00   | 1.00 | 0.00   | 0.00   | 1.00        | 0.00   | 0.00   | 1.00 |
| Congested nose                        | 10.00  | 7.50   | 0.69        | 5.00   | 10.00  | 0.40 | 10.00  | 5.00   | 0.40        | 5.00   | 5.00   | 1.00 |
| Sneezing                              | 2.50   | 2.50   | 1.00        | 0.00   | 2.50   | 0.31 | 7.50   | 2.50   | 0.30        | 7.50   | 2.50   | 0.30 |
| Nasal irritation                      | 5.00   | 5.00   | 1.00        | 5.00   | 0.00   | 0.15 | 7.50   | 2.50   | 0.30        | 2.50   | 0.00   | 0.31 |
| Runny nose                            | 2.50   | 2.50   | 1.00        | 2.50   | 2.50   | 1.00 | 2.50   | 0.00   | 0.31        | 7.50   | 0.00   | 0.08 |
| Burning sensation in nose and/or ears | 5.00   | 0.00   | 0.15        | 5.00   | 0.00   | 0.15 | 5.00   | 0.00   | 0.15        | 2.50   | 0.00   | 0.31 |
| Sensitive to fragrances               | 0.00   | 0.00   | 1.00        | 0.00   | 0.00   | 1.00 | 0.00   | 0.00   | 1.00        | 2.50   | 0.00   | 0.31 |
| Watery eyes                           | 0.00   | 0.00   | 1.00        | 2.50   | 0.00   | 0.31 | 0.00   | 0.00   | 1.00        | 2.50   | 0.00   | 0.31 |

|                                     |       |       |             |       |       |      |       |       |             |       |       |      |
|-------------------------------------|-------|-------|-------------|-------|-------|------|-------|-------|-------------|-------|-------|------|
| Nausea and/or vomiting              | 2.50  | 7.50  | 0.30        | 5.00  | 2.50  | 0.56 | 2.50  | 0.00  | 0.31        | 0.00  | 0.00  | 1.00 |
| Abdominal or stomach pain           | 12.50 | 10.00 | 0.72        | 15.00 | 7.50  | 0.29 | 12.50 | 0.00  | <b>0.02</b> | 7.50  | 7.50  | 1.00 |
| Decreased appetite                  | 2.50  | 5.00  | 0.56        | 2.50  | 2.50  | 1.00 | 5.00  | 0.00  | 0.15        | 2.50  | 0.00  | 0.31 |
| Hungry or increased appetite        | 0.00  | 2.50  | 0.31        | 0.00  | 2.50  | 0.31 | 2.50  | 0.00  | 0.31        | 0.00  | 0.00  | 1.00 |
| Constipation                        | 7.50  | 2.50  | 0.30        | 5.00  | 0.00  | 0.15 | 7.50  | 0.00  | 0.08        | 7.50  | 2.50  | 0.30 |
| Diarrhea                            | 0.00  | 2.50  | 0.31        | 2.50  | 2.50  | 1.00 | 2.50  | 0.00  | 0.31        | 0.00  | 0.00  | 1.00 |
| Muscle pain/cramps                  | 5.00  | 0.00  | 0.15        | 5.00  | 0.00  | 0.15 | 5.00  | 0.00  | 0.15        | 5.00  | 2.50  | 0.56 |
| Skin rash                           | 2.50  | 0.00  | 0.31        | 2.50  | 0.00  | 0.31 | 0.00  | 0.00  | 1.00        | 5.00  | 0.00  | 0.15 |
| Increased fluid intake              | 0.00  | 0.00  | 1.00        | 0.00  | 0.00  | 1.00 | 2.50  | 0.00  | 0.31        | 0.00  | 0.00  | 1.00 |
| Water retention/bloating            | 0.00  | 0.00  | 1.00        | 2.50  | 0.00  | 0.31 | 0.00  | 0.00  | 1.00        | 2.50  | 0.00  | 0.31 |
| Insomnia/sleep difficulties         | 5.00  | 0.00  | 0.15        | 5.00  | 5.00  | 1.00 | 5.00  | 0.00  | 0.15        | 0.00  | 5.00  | 0.15 |
| Nightmares                          | 2.50  | 0.00  | 0.31        | 0.00  | 0.00  | 1.00 | 0.00  | 0.00  | 1.00        | 0.00  | 0.00  | 1.00 |
| Staring/daydreams                   | 0.00  | 0.00  | 1.00        | 2.50  | 0.00  | 0.31 | 0.00  | 0.00  | 1.00        | 2.50  | 0.00  | 0.31 |
| Anaphylaxis                         | 0.00  | 0.00  | 1.00        | 0.00  | 0.00  | 1.00 | 0.00  | 0.00  | 1.00        | 0.00  | 0.00  | 1.00 |
| Changes in perception of the tongue | 0.00  | 0.00  | 1.00        | 0.00  | 0.00  | 1.00 | 0.00  | 0.00  | 1.00        | 0.00  | 0.00  | 1.00 |
| Back pain                           | 0.00  | 0.00  | 1.00        | 0.00  | 0.00  | 1.00 | 0.00  | 0.00  | 1.00        | 0.00  | 0.00  | 1.00 |
| Bed wetting                         | 0.00  | 2.50  | 0.31        | 0.00  | 5.00  | 0.15 | 0.00  | 0.00  | 1.00        | 0.00  | 0.00  | 1.00 |
| Weight gain                         | 0.00  | 0.00  | 1.00        | 0.00  | 0.00  | 1.00 | 0.00  | 0.00  | 1.00        | 0.00  | 0.00  | 1.00 |
| Sweating                            | 0.00  | 0.00  | 1.00        | 2.50  | 0.00  | 0.31 | 0.00  | 0.00  | 1.00        | 0.00  | 0.00  | 1.00 |
| Blurred vision                      | 0.00  | 0.00  | 1.00        | 0.00  | 0.00  | 1.00 | 0.00  | 0.00  | 1.00        | 0.00  | 0.00  | 1.00 |
| Less talk to others                 | 0.00  | 0.00  | 1.00        | 0.00  | 2.50  | 0.31 | 2.50  | 0.00  | 0.31        | 2.50  | 2.50  | 1.00 |
| Uninterested in others              | 0.00  | 0.00  | 1.00        | 0.00  | 2.50  | 0.31 | 0.00  | 0.00  | 1.00        | 2.50  | 0.00  | 0.31 |
| Persistent thoughts and/or feelings | 2.50  | 7.50  | 0.30        | 0.00  | 5.00  | 0.15 | 2.50  | 2.50  | 1.00        | 0.00  | 2.50  | 0.31 |
| Development of repetitive behavior  | 0.00  | 0.00  | 1.00        | 2.50  | 0.00  | 0.31 | 0.00  | 2.50  | 0.31        | 0.00  | 0.00  | 1.00 |
| Increase in repetitive behavior     | 2.50  | 0.00  | 0.31        | 2.50  | 0.00  | 0.31 | 0.00  | 2.50  | 0.31        | 0.00  | 0.00  | 1.00 |
| Nail biting                         | 0.00  | 0.00  | 1.00        | 0.00  | 0.00  | 1.00 | 0.00  | 0.00  | 1.00        | 2.50  | 0.00  | 0.31 |
| Irritability or Anger               | 0.00  | 7.50  | 0.08        | 2.50  | 7.50  | 0.30 | 7.50  | 5.00  | 0.64        | 10.00 | 7.50  | 0.69 |
| Sad                                 | 2.50  | 0.00  | 0.31        | 0.00  | 7.50  | 0.08 | 2.50  | 5.00  | 0.56        | 5.00  | 5.00  | 1.00 |
| Prone to crying or more emotional   | 2.50  | 5.00  | 0.56        | 2.50  | 12.50 | 0.09 | 7.50  | 12.50 | 0.46        | 5.00  | 7.50  | 0.64 |
| Anxious, worried or discomfort      | 0.00  | 0.00  | 1.00        | 5.00  | 0.00  | 0.15 | 5.00  | 2.50  | 0.56        | 2.50  | 2.50  | 1.00 |
| Happy or satisfied                  | 10.00 | 25.00 | 0.08        | 7.50  | 15.00 | 0.29 | 17.50 | 15.00 | 0.76        | 7.50  | 12.50 | 0.46 |
| Euphoric or unusually happy         | 5.00  | 10.00 | 0.40        | 7.50  | 7.50  | 1.00 | 7.50  | 5.00  | 0.64        | 10.00 | 2.50  | 0.17 |
| Calm, relaxed or comfortable        | 10.00 | 25.00 | 0.08        | 15.00 | 17.50 | 0.76 | 12.50 | 22.50 | 0.24        | 7.50  | 10.00 | 0.69 |
| More focused                        | 0.00  | 2.50  | 0.31        | 0.00  | 5.00  | 0.15 | 2.50  | 2.50  | 1.00        | 0.00  | 2.50  | 0.31 |
| More confidence                     | 0.00  | 12.50 | <b>0.02</b> | 7.50  | 7.50  | 1.00 | 7.50  | 5.00  | 0.64        | 5.00  | 7.50  | 0.64 |

**Phase II (single-blind)**  
(OT<sub>first</sub> n = 38; PL<sub>first</sub> n = 39)

|                                       | Week 1                  |                         |      | Week 2                  |                         |      | Week 3                  |                         |      | Week 4                  |                         |      |
|---------------------------------------|-------------------------|-------------------------|------|-------------------------|-------------------------|------|-------------------------|-------------------------|------|-------------------------|-------------------------|------|
|                                       | OT <sub>first</sub> (%) | PL <sub>first</sub> (%) | p    | OT <sub>first</sub> (%) | PL <sub>first</sub> (%) | p    | OT <sub>first</sub> (%) | PL <sub>first</sub> (%) | p    | OT <sub>first</sub> (%) | PL <sub>first</sub> (%) | P    |
| Headache                              | 5.26                    | 10.26                   | 0.41 | 2.63                    | 7.69                    | 0.32 | 10.53                   | 5.13                    | 0.38 | 5.26                    | 2.56                    | 0.54 |
| Drowsiness                            | 2.63                    | 0.00                    | 0.31 | 2.63                    | 2.56                    | 0.99 | 0.00                    | 0.00                    | 1.00 | 0.00                    | 0.00                    | 1.00 |
| Dizziness                             | 0.00                    | 2.56                    | 0.32 | 0.00                    | 2.56                    | 0.32 | 0.00                    | 0.00                    | 1.00 | 0.00                    | 0.00                    | 1.00 |
| Fainting                              | 0.00                    | 0.00                    | 1.00 | 0.00                    | 0.00                    | 1.00 | 0.00                    | 0.00                    | 1.00 | 0.00                    | 0.00                    | 1.00 |
| Changes in heart rate or palpitations | 0.00                    | 0.00                    | 1.00 | 0.00                    | 0.00                    | 1.00 | 0.00                    | 0.00                    | 1.00 | 5.26                    | 0.00                    | 0.15 |
| Shortness of breath                   | 0.00                    | 0.00                    | 1.00 | 0.00                    | 0.00                    | 1.00 | 0.00                    | 2.56                    | 0.32 | 0.00                    | 0.00                    | 1.00 |

|                                       |       |       |      |       |       |      |      |      |      |      |      |      |
|---------------------------------------|-------|-------|------|-------|-------|------|------|------|------|------|------|------|
| Fever                                 | 0.00  | 2.56  | 0.32 | 0.00  | 2.56  | 0.32 | 0.00 | 0.00 | 1.00 | 0.00 | 2.56 | 0.32 |
| Sore throat                           | 2.63  | 5.13  | 0.57 | 2.63  | 7.69  | 0.32 | 5.26 | 5.13 | 0.98 | 5.26 | 0.00 | 0.15 |
| Dry throat/dry mouth                  | 0.00  | 2.56  | 0.32 | 7.89  | 2.56  | 0.29 | 5.26 | 2.56 | 0.54 | 5.26 | 2.56 | 0.54 |
| Hoarseness                            | 0.00  | 0.00  | 1.00 | 2.63  | 0.00  | 0.31 | 2.63 | 2.56 | 0.99 | 2.63 | 0.00 | 0.31 |
| Coughing                              | 2.63  | 2.56  | 0.99 | 2.63  | 0.00  | 0.31 | 2.63 | 2.56 | 0.99 | 5.26 | 0.00 | 0.15 |
| Coughing up mucus                     | 0.00  | 0.00  | 1.00 | 2.63  | 0.00  | 0.31 | 2.63 | 0.00 | 0.31 | 0.00 | 0.00 | 1.00 |
| Congested nose                        | 2.63  | 5.13  | 0.57 | 5.26  | 5.13  | 0.98 | 5.26 | 7.69 | 0.67 | 7.89 | 0.00 | 0.07 |
| Sneezing                              | 0.00  | 0.00  | 1.00 | 0.00  | 2.56  | 0.32 | 0.00 | 2.56 | 0.32 | 2.63 | 0.00 | 0.31 |
| Nasal irritation                      | 2.63  | 5.13  | 0.57 | 0.00  | 0.00  | 1.00 | 5.26 | 2.56 | 0.54 | 7.89 | 0.00 | 0.07 |
| Runny nose                            | 2.63  | 0.00  | 0.31 | 0.00  | 2.56  | 0.32 | 2.63 | 5.13 | 0.57 | 0.00 | 5.13 | 0.16 |
| Burning sensation in nose and/or ears | 0.00  | 2.56  | 0.32 | 0.00  | 0.00  | 1.00 | 2.63 | 0.00 | 0.31 | 0.00 | 0.00 | 1.00 |
| Sensitive to fragrances               | 0.00  | 0.00  | 1.00 | 2.63  | 2.56  | 0.99 | 2.63 | 0.00 | 0.31 | 2.63 | 0.00 | 0.31 |
| Watery eyes                           | 0.00  | 0.00  | 1.00 | 0.00  | 0.00  | 1.00 | 2.63 | 0.00 | 0.31 | 2.63 | 0.00 | 0.31 |
| Nausea and/or vomiting                | 2.63  | 0.00  | 0.31 | 5.26  | 0.00  | 0.15 | 2.63 | 2.56 | 0.99 | 2.63 | 0.00 | 0.31 |
| Abdominal or stomach pain             | 5.26  | 2.56  | 0.54 | 13.16 | 7.69  | 0.43 | 5.26 | 2.56 | 0.54 | 2.63 | 2.56 | 0.99 |
| Decreased appetite                    | 2.63  | 0.00  | 0.31 | 7.89  | 7.69  | 0.97 | 2.63 | 5.13 | 0.57 | 2.63 | 2.56 | 0.99 |
| Hungry or increased appetite          | 0.00  | 0.00  | 1.00 | 2.63  | 2.56  | 0.99 | 0.00 | 0.00 | 1.00 | 0.00 | 0.00 | 1.00 |
| Constipation                          | 0.00  | 0.00  | 1.00 | 2.63  | 0.00  | 0.31 | 0.00 | 0.00 | 1.00 | 0.00 | 0.00 | 1.00 |
| Diarrhea                              | 5.26  | 0.00  | 0.15 | 5.26  | 0.00  | 0.15 | 0.00 | 0.00 | 1.00 | 0.00 | 0.00 | 1.00 |
| Muscle pain/cramps                    | 7.89  | 0.00  | 0.07 | 2.63  | 5.13  | 0.57 | 2.63 | 0.00 | 0.31 | 5.26 | 0.00 | 0.15 |
| Skin rash                             | 2.63  | 0.00  | 0.31 | 5.26  | 0.00  | 0.15 | 2.63 | 0.00 | 0.31 | 0.00 | 2.56 | 0.32 |
| Increased fluid intake                | 0.00  | 2.56  | 0.32 | 2.63  | 0.00  | 0.31 | 5.26 | 2.56 | 0.54 | 2.63 | 0.00 | 0.31 |
| Water retention/bloating              | 0.00  | 0.00  | 1.00 | 0.00  | 0.00  | 1.00 | 0.00 | 0.00 | 1.00 | 0.00 | 0.00 | 1.00 |
| Insomnia/sleep difficulties           | 0.00  | 0.00  | 1.00 | 0.00  | 2.56  | 0.32 | 2.63 | 2.56 | 0.99 | 5.26 | 2.56 | 0.54 |
| Nightmares                            | 2.63  | 0.00  | 0.31 | 2.63  | 0.00  | 0.31 | 0.00 | 0.00 | 1.00 | 0.00 | 0.00 | 1.00 |
| Staring/daydreams                     | 2.63  | 0.00  | 0.31 | 2.63  | 2.56  | 0.99 | 0.00 | 0.00 | 1.00 | 0.00 | 0.00 | 1.00 |
| Anaphylaxis                           | 0.00  | 0.00  | 1.00 | 0.00  | 0.00  | 1.00 | 0.00 | 0.00 | 1.00 | 0.00 | 0.00 | 1.00 |
| Changes in perception of the tongue   | 0.00  | 0.00  | 1.00 | 0.00  | 0.00  | 1.00 | 0.00 | 0.00 | 1.00 | 0.00 | 0.00 | 1.00 |
| Back pain                             | 0.00  | 0.00  | 1.00 | 0.00  | 0.00  | 1.00 | 0.00 | 0.00 | 1.00 | 0.00 | 0.00 | 1.00 |
| Bed wetting                           | 0.00  | 0.00  | 1.00 | 2.63  | 0.00  | 0.31 | 0.00 | 0.00 | 1.00 | 0.00 | 0.00 | 1.00 |
| Weight gain                           | 0.00  | 0.00  | 1.00 | 0.00  | 2.56  | 0.32 | 0.00 | 0.00 | 1.00 | 0.00 | 0.00 | 1.00 |
| Sweating                              | 0.00  | 0.00  | 1.00 | 2.63  | 0.00  | 0.31 | 2.63 | 2.56 | 0.99 | 2.63 | 2.56 | 0.99 |
| Blurred vision                        | 0.00  | 0.00  | 1.00 | 0.00  | 0.00  | 1.00 | 0.00 | 0.00 | 1.00 | 0.00 | 0.00 | 1.00 |
| Less talk to others                   | 0.00  | 0.00  | 1.00 | 0.00  | 7.69  | 0.08 | 0.00 | 2.56 | 0.32 | 2.63 | 2.56 | 0.99 |
| Uninterested in others                | 0.00  | 0.00  | 1.00 | 0.00  | 2.56  | 0.32 | 2.63 | 0.00 | 0.31 | 2.63 | 0.00 | 0.31 |
| Persistent thoughts and/or feelings   | 0.00  | 2.56  | 0.32 | 2.63  | 5.13  | 0.57 | 2.63 | 0.00 | 0.31 | 5.26 | 0.00 | 0.15 |
| Development of repetitive behavior    | 5.26  | 0.00  | 0.15 | 0.00  | 0.00  | 1.00 | 0.00 | 2.56 | 0.32 | 0.00 | 0.00 | 1.00 |
| Increase in repetitive behavior       | 0.00  | 0.00  | 1.00 | 2.63  | 2.56  | 0.99 | 0.00 | 0.00 | 1.00 | 0.00 | 0.00 | 1.00 |
| Nail biting                           | 2.63  | 0.00  | 0.31 | 2.63  | 0.00  | 0.31 | 0.00 | 0.00 | 1.00 | 0.00 | 2.56 | 0.32 |
| Irritability or Anger                 | 2.63  | 2.56  | 0.99 | 7.89  | 10.26 | 0.72 | 5.26 | 5.13 | 0.98 | 5.26 | 0.00 | 0.15 |
| Sad                                   | 2.63  | 0.00  | 0.31 | 7.89  | 5.13  | 0.62 | 2.63 | 0.00 | 0.31 | 0.00 | 0.00 | 1.00 |
| Prone to crying or more emotional     | 2.63  | 2.56  | 0.99 | 13.16 | 2.56  | 0.08 | 7.89 | 0.00 | 0.07 | 2.63 | 5.13 | 0.57 |
| Anxious, worried or discomfort        | 2.63  | 0.00  | 0.31 | 5.26  | 2.56  | 0.54 | 5.26 | 0.00 | 0.15 | 2.63 | 0.00 | 0.31 |
| Happy or satisfied                    | 21.05 | 12.82 | 0.33 | 15.79 | 12.82 | 0.71 | 7.89 | 7.69 | 0.97 | 5.26 | 7.69 | 0.67 |
| Euphoric or unusually happy           | 5.26  | 2.56  | 0.54 | 5.26  | 0.00  | 0.15 | 2.63 | 2.56 | 0.99 | 2.63 | 0.00 | 0.31 |



|                              |       |       |      |       |       |      |       |       |      |      |       |      |
|------------------------------|-------|-------|------|-------|-------|------|-------|-------|------|------|-------|------|
| Calm, relaxed or comfortable | 18.42 | 15.38 | 0.72 | 13.16 | 12.82 | 0.96 | 10.53 | 10.26 | 0.97 | 7.89 | 12.82 | 0.48 |
| More focused                 | 5.26  | 0.00  | 0.15 | 5.26  | 5.13  | 0.98 | 0.00  | 5.13  | 0.16 | 0.00 | 0.00  | 1.00 |
| More confidence              | 7.89  | 5.13  | 0.62 | 7.89  | 5.13  | 0.62 | 0.00  | 7.69  | 0.08 | 0.00 | 7.69  | 0.08 |

| Panel C<br>Number of other incidental events in spontaneous reports | Phase I (double-blind) |    |        |    |        |    |        |    | Phase II (single-blind) |                     |                     |                     |                     |                     |                     |                     |
|---------------------------------------------------------------------|------------------------|----|--------|----|--------|----|--------|----|-------------------------|---------------------|---------------------|---------------------|---------------------|---------------------|---------------------|---------------------|
|                                                                     | Week 1                 |    | Week 2 |    | Week 3 |    | Week 4 |    | Week 1                  |                     | Week 2              |                     | Week 3              |                     | Week 4              |                     |
|                                                                     | OT                     | PL | OT     | PL | OT     | PL | OT     | PL | OT <sub>first</sub>     | PL <sub>first</sub> | OT <sub>first</sub> | PL <sub>first</sub> | OT <sub>first</sub> | PL <sub>first</sub> | OT <sub>first</sub> | PL <sub>first</sub> |
| Nose bleeding                                                       | 0                      | 0  | 0      | 1  | 0      | 0  | 0      | 1  | 0                       | 0                   | 0                   | 1                   | 0                   | 0                   | 0                   | 0                   |
| Fracture                                                            | 0                      | 0  | 0      | 0  | 0      | 0  | 0      | 0  | 0                       | 0                   | 0                   | 0                   | 0                   | 0                   | 0                   | 1                   |
| Earache                                                             | 0                      | 0  | 1      | 0  | 0      | 0  | 0      | 0  | 0                       | 0                   | 0                   | 0                   | 0                   | 0                   | 0                   | 0                   |
| Inappropriate Affect                                                | 0                      | 1  | 0      | 0  | 0      | 1  | 0      | 1  | 0                       | 1                   | 0                   | 1                   | 1                   | 0                   | 1                   | 1                   |
| Mood swings                                                         | 0                      | 0  | 0      | 0  | 0      | 0  | 1      | 0  | 0                       | 0                   | 0                   | 0                   | 0                   | 0                   | 0                   | 0                   |
| Less focussed                                                       | 1                      | 0  | 0      | 0  | 0      | 0  | 1      | 0  | 3                       | 0                   | 2                   | 0                   | 0                   | 0                   | 0                   | 0                   |
| Fecal incontinence                                                  | 0                      | 0  | 0      | 0  | 0      | 0  | 1      | 0  | 0                       | 0                   | 0                   | 0                   | 0                   | 0                   | 0                   | 0                   |
| Feeling cold                                                        | 0                      | 1  | 0      | 0  | 0      | 0  | 0      | 0  | 0                       | 0                   | 0                   | 0                   | 0                   | 0                   | 0                   | 0                   |

## Supplementary Table 4

### Daily screenings of changes in affect and arousal.

Both participants and their parents completed a structured daily diary for four consecutive weeks in phase I (double-blind phase) and another four weeks in phase II (single-blind extension phase). Once daily, parents were asked to complete two 9-point Manikin rating scales, rating their child's perceived arousal (1= calm, 9= excited) and valence (1= feeling pleasant/happy, 9= feeling unpleasant/unhappy; [1]). Children also completed a self-report of the arousal and valence scale, twice-daily, once at noon and once in the evening.

To examine treatment-related differences in the daily screenings, weekly averages were calculated for each rating and subjected to a general linear model with the within-subject factor 'week' (week 1-4) and the between-subject factors 'treatment' (oxytocin, placebo).

None of the scales yielded a significant main effect of 'treatment' **across weeks** (all,  $p > .05$ ), indicating no overall significant group differences in ratings of valence or arousal, either by the parents or by the child, both in phase I and phase II.

Closer analysis of treatment effects **separately for each week** revealed a significant group difference in child-ratings of valence (in the evening), indicating higher feelings of 'unpleasantness' in the oxytocin, compared to the placebo group during the second week of the phase I treatment. Also in the first week of phase II, a similar effect was noted, indicating that children who crossed over from the placebo treatment (in phase I) to the oxytocin treatment (in phase II) (placebo-first group) reported slightly higher feelings of 'unpleasantness', compared to children who were receiving their second course of oxytocin treatment (oxytocin-first group).

In the table below, weekly averages (and average responses across the four weeks) are reported separately for each treatment group (oxytocin, placebo) and phase (phase I and II). P-values correspond to independent-sample t-tests (or F-tests) assessing between-group differences in ratings of arousal and valence. Data printed in bold show p-values equal to or larger than 0.05.

Notably, for several of the scales, the general linear model also revealed a main effect of 'week', indicating that across treatment groups, both parents and children reported improvements in reports of valence (more pleasant) and arousal (more calm) from the first to the last week of the trial, particularly in phase II, when all children received the 'actual' oxytocin treatment (phase II, parent-reported valence:

$F(3,216) = 4.14; p = .007$ ; child-reported valence (noon & evening):  $F(3,213) > 3.09; p < .028$ ; child-reported arousal (noon & evening)  $F(3,213) > 6.88; p < .001$ ). Also in phase I, an overall effect of 'week' was evident in terms of child-reported valence (only at noon) ( $F(3,195) = 5.62; p = .001$ ).

In addition to the ratings of arousal and valence, parents were also asked to indicate how they experienced the interaction with their child while completing the daily diary together, using a 5-point scale (1 = unpleasant/difficult; 5 = pleasant/easy). Generally, child-parent interactions while completing the daily diaries were experienced to be overall 'pleasant/easy', with slightly more pleasant experiences of the child-parent interaction in the oxytocin group, compared to the placebo group in phase I of the trial (oxytocin ( $n = 38$ ):  $4.32 \pm 0.47$ ; placebo ( $n = 36$ ):  $4.06 \pm 0.58$ ;  $t(72) = 2.26, p = .027$ ). Differences in the experiences of the child-parent interaction were no longer evident in phase II of the trial, when all children received the actual oxytocin treatment (oxytocin-first ( $n = 36$ ):  $4.14 \pm 0.73$ ; placebo-first ( $n = 37$ ):  $3.84 \pm 0.84$ ;  $t(71) = 1.62, p = .11$ ). Generally, these overall positive ratings provide an indication that the completion of the daily diaries was well-tolerated, both by the children and their parents.

**Reference:** [1] Bradley MM, Lang PJ. Measuring emotion: the Self-Assessment Manikin and the Semantic Differential. *J. Behav. Ther. Exp. Psychiatry*. 1994;25:49–59.

|                         | Phase I (double-blind) |      |        |         |      | Phase II (single-blind) |                           |    |      |                          |    |         |        |              |
|-------------------------|------------------------|------|--------|---------|------|-------------------------|---------------------------|----|------|--------------------------|----|---------|--------|--------------|
|                         | Oxytocin               |      |        | Placebo |      | p-value                 | Oxytocin <sub>first</sub> |    |      | Placebo <sub>first</sub> |    | p-value |        |              |
|                         | N                      | Mean | ± SD   | N       | Mean |                         | ± SD                      | N  | Mean | ± SD                     | N  |         | Mean   | ± SD         |
| <b>Week 1</b>           |                        |      |        |         |      |                         |                           |    |      |                          |    |         |        |              |
| <b>Informant report</b> |                        |      |        |         |      |                         |                           |    |      |                          |    |         |        |              |
| Valence                 | 37                     | 3.10 | ± 0.92 | 36      | 3.03 | ± 1.17                  | 0.780                     | 36 | 3.74 | ± 1.54                   | 38 | 3.55    | ± 1.23 | 0.565        |
| Arousal                 | 37                     | 3.70 | ± 1.13 | 36      | 3.64 | ± 1.24                  | 0.831                     | 36 | 3.05 | ± 1.03                   | 38 | 3.30    | ± 1.36 | 0.366        |
| <b>Self report</b>      |                        |      |        |         |      |                         |                           |    |      |                          |    |         |        |              |
| Valence - noon          | 36                     | 2.71 | ± 1.15 | 35      | 2.68 | ± 1.19                  | 0.905                     | 37 | 2.36 | ± 1.11                   | 39 | 2.67    | ± 1.32 | 0.280        |
| Arousal - noon          | 36                     | 3.30 | ± 1.20 | 35      | 3.20 | ± 1.25                  | 0.749                     | 37 | 3.07 | ± 1.51                   | 39 | 3.27    | ± 1.57 | 0.578        |
| Valence - evening       | 36                     | 2.69 | ± 1.15 | 35      | 2.70 | ± 1.13                  | 0.957                     | 37 | 2.25 | ± 1.07                   | 39 | 2.92    | ± 1.32 | <b>0.017</b> |
| Arousal - evening       | 36                     | 3.47 | ± 1.29 | 35      | 3.16 | ± 1.07                  | 0.279                     | 37 | 3.10 | ± 1.67                   | 39 | 3.49    | ± 1.48 | 0.283        |
| <b>Week 2</b>           |                        |      |        |         |      |                         |                           |    |      |                          |    |         |        |              |
| <b>Informant report</b> |                        |      |        |         |      |                         |                           |    |      |                          |    |         |        |              |
| Valence                 | 37                     | 3.23 | ± 1.04 | 36      | 2.96 | ± 1.32                  | 0.323                     | 36 | 3.55 | ± 1.55                   | 38 | 3.32    | ± 1.11 | 0.461        |
| Arousal                 | 37                     | 3.93 | ± 1.45 | 36      | 3.55 | ± 1.36                  | 0.246                     | 36 | 2.79 | ± 0.96                   | 38 | 2.99    | ± 1.27 | 0.446        |
| <b>Self report</b>      |                        |      |        |         |      |                         |                           |    |      |                          |    |         |        |              |
| Valence - noon          | 36                     | 2.78 | ± 1.25 | 35      | 2.31 | ± 1.20                  | 0.109                     | 35 | 2.02 | ± 0.94                   | 38 | 2.41    | ± 1.24 | 0.139        |
| Arousal - noon          | 36                     | 3.58 | ± 1.66 | 35      | 3.00 | ± 1.53                  | 0.135                     | 35 | 2.92 | ± 1.71                   | 38 | 2.89    | ± 1.40 | 0.922        |
| Valence - evening       | 36                     | 3.01 | ± 1.28 | 35      | 2.32 | ± 1.15                  | <b>0.019</b>              | 35 | 2.32 | ± 1.04                   | 38 | 2.53    | ± 1.21 | 0.441        |
| Arousal - evening       | 36                     | 3.70 | ± 1.49 | 35      | 3.04 | ± 1.38                  | 0.057                     | 35 | 3.20 | ± 1.69                   | 38 | 2.94    | ± 1.37 | 0.477        |
| <b>Week 3</b>           |                        |      |        |         |      |                         |                           |    |      |                          |    |         |        |              |
| <b>Informant report</b> |                        |      |        |         |      |                         |                           |    |      |                          |    |         |        |              |
| Valence                 | 37                     | 3.19 | ± 1.09 | 36      | 2.95 | ± 1.08                  | 0.345                     | 37 | 3.83 | ± 1.97                   | 39 | 3.23    | ± 1.41 | 0.124        |
| Arousal                 | 37                     | 3.86 | ± 1.38 | 36      | 3.32 | ± 1.31                  | 0.092                     | 37 | 3.03 | ± 1.24                   | 39 | 2.80    | ± 1.19 | 0.422        |
| <b>Self report</b>      |                        |      |        |         |      |                         |                           |    |      |                          |    |         |        |              |
| Valence - noon          | 36                     | 2.47 | ± 1.15 | 34      | 2.25 | ± 1.15                  | 0.434                     | 36 | 2.03 | ± 1.04                   | 38 | 2.29    | ± 1.08 | 0.286        |
| Arousal - noon          | 36                     | 3.21 | ± 1.47 | 34      | 3.01 | ± 1.67                  | 0.588                     | 36 | 2.80 | ± 1.68                   | 38 | 2.62    | ± 1.37 | 0.618        |
| Valence - evening       | 36                     | 2.73 | ± 1.11 | 34      | 2.39 | ± 1.27                  | 0.230                     | 36 | 2.20 | ± 0.99                   | 38 | 2.37    | ± 1.15 | 0.504        |
| Arousal - evening       | 36                     | 3.26 | ± 1.33 | 34      | 3.17 | ± 1.73                  | 0.801                     | 36 | 2.96 | ± 1.77                   | 38 | 2.52    | ± 1.24 | 0.226        |
| <b>Week 4</b>           |                        |      |        |         |      |                         |                           |    |      |                          |    |         |        |              |
| <b>Informant report</b> |                        |      |        |         |      |                         |                           |    |      |                          |    |         |        |              |
| Valence                 | 35                     | 3.11 | ± 0.81 | 36      | 2.89 | ± 1.26                  | 0.383                     | 37 | 3.63 | ± 1.86                   | 39 | 3.13    | ± 1.33 | 0.179        |
| Arousal                 | 35                     | 3.79 | ± 1.35 | 36      | 3.23 | ± 1.31                  | 0.081                     | 37 | 2.89 | ± 1.28                   | 39 | 2.79    | ± 1.15 | 0.724        |
| <b>Self report</b>      |                        |      |        |         |      |                         |                           |    |      |                          |    |         |        |              |
| Valence - noon          | 34                     | 2.51 | ± 1.09 | 34      | 2.23 | ± 1.17                  | 0.306                     | 36 | 2.03 | ± 0.98                   | 38 | 2.08    | ± 0.95 | 0.801        |
| Arousal - noon          | 34                     | 3.03 | ± 1.37 | 34      | 2.91 | ± 1.42                  | 0.721                     | 36 | 2.85 | ± 1.74                   | 38 | 2.57    | ± 1.43 | 0.450        |
| Valence - evening       | 34                     | 2.72 | ± 1.18 | 34      | 2.51 | ± 1.25                  | 0.467                     | 36 | 2.18 | ± 1.05                   | 38 | 2.34    | ± 1.10 | 0.533        |
| Arousal - evening       | 34                     | 3.35 | ± 1.23 | 34      | 3.16 | ± 1.65                  | 0.607                     | 36 | 3.07 | ± 1.79                   | 38 | 2.79    | ± 1.45 | 0.462        |
| <b>Across weeks</b>     |                        |      |        |         |      |                         |                           |    |      |                          |    |         |        |              |
| <b>Informant report</b> |                        |      |        |         |      |                         |                           |    |      |                          |    |         |        |              |
| Valence                 | 37                     | 3.17 | ± 0.70 | 36      | 2.96 | ± 1.00                  | 0.302                     | 36 | 3.69 | ± 1.60                   | 38 | 3.26    | ± 1.00 | 0.163        |
| Arousal                 | 37                     | 3.83 | ± 1.15 | 36      | 3.43 | ± 1.06                  | 0.131                     | 36 | 2.94 | ± 0.95                   | 38 | 2.93    | ± 1.05 | 0.969        |
| <b>Self report</b>      |                        |      |        |         |      |                         |                           |    |      |                          |    |         |        |              |
| Valence - noon          | 36                     | 2.62 | ± 0.98 | 35      | 2.36 | ± 1.10                  | 0.282                     | 37 | 2.18 | ± 1.02                   | 39 | 2.42    | ± 1.09 | 0.333        |
| Arousal - noon          | 36                     | 2.79 | ± 1.02 | 35      | 2.46 | ± 1.02                  | 0.175                     | 37 | 2.24 | ± 0.86                   | 39 | 2.59    | ± 1.06 | 0.120        |
| Valence - evening       | 36                     | 3.29 | ± 1.23 | 35      | 3.01 | ± 1.29                  | 0.355                     | 37 | 2.92 | ± 1.54                   | 39 | 2.88    | ± 1.38 | 0.917        |
| Arousal - evening       | 36                     | 3.45 | ± 1.14 | 35      | 3.11 | ± 1.28                  | 0.247                     | 37 | 3.06 | ± 1.62                   | 39 | 2.99    | ± 1.24 | 0.818        |

**Valence scale:** Higher scores denote feeling more unpleasant/unhappy (1= feeling pleasant/happy, 9= feeling unpleasant/unhappy). **Arousal scale:** Higher scores denote feeling more excited (1= calm, 9= excited).

## Supplementary Table 5

Detailed description of questionnaires adopted as descriptive, primary or secondary outcomes.

| Outcome measures                                            | Construct                         | Type of outcome | Type of report  | Number of items                | Range of scores | Rating scale (points) | Meaning of higher scores                         | Reference |
|-------------------------------------------------------------|-----------------------------------|-----------------|-----------------|--------------------------------|-----------------|-----------------------|--------------------------------------------------|-----------|
| <b>Autism Diagnostic Observation Schedule (ADOS-2)</b>      | Symptom severity                  | Descriptive     | Observation     | Per module                     | 1-10            | -                     | More severe symptoms of autism spectrum disorder | [1]       |
| <b>Wechsler Intelligence Scale for Children (WISC-V-NL)</b> | Verbal Intelligence Quotient      | Descriptive     | Observation     | Similarities<br>Vocabulary     | 40 - 145        | -                     | Higher verbal abilities                          | [2]       |
|                                                             | Performance Intelligence Quotient |                 |                 | Block Design<br>Visual Puzzles | 40 - 145        | -                     | Higher visual spatial abilities                  |           |
| <b>Social Responsiveness Scale-Children (SRS-2)</b>         | Symptom severity                  | Primary         | Parent          | 65                             | 0 - 192         | 0-3                   | Greater deficits in social responsiveness        | [3], [4]  |
| <b>Repetitive Behavior Scale-Revised (RBS-R)</b>            | Repetitive behavior               | Secondary       | Parent          | 43                             | 0 - 129         | 0-3                   | More severe repetitive behavior                  | [5], [6]  |
| <b>Screen for Child Anxiety Related</b>                     | Anxiety                           | Secondary       | Parent and self | 69                             | 0 - 207         | 0-2                   | Higher risk for anxiety disorders                | [7]       |

|                                                                                                                   |            |           |      |    |                        |     |                                                                |     |
|-------------------------------------------------------------------------------------------------------------------|------------|-----------|------|----|------------------------|-----|----------------------------------------------------------------|-----|
| <b>Emotional Disorders (SCARED-NL)</b>                                                                            |            |           |      |    |                        |     |                                                                |     |
| <b>Attachment Style Classification Questionnaire (ASCQ)</b><br><b>Anxious</b><br><b>Avoidant</b><br><b>Secure</b> | Attachment | Secondary | Self | 15 | Per subscale<br>5 - 25 | 1-5 | More anxious, avoidant or secure attachment toward their peers | [8] |
| <b>Attachment questionnaire</b><br><b>Anxious</b><br><b>Avoidant</b><br><b>Secure</b>                             | Attachment | Secondary | Self | 9  | Per subscale<br>3 - 21 | 1-7 | More anxiety, avoidance or trust toward their mother           | [9] |

**References:**

- [1] Lord C, Rutter M, DiLavore PC, Risi S, Gotham K, Bishop SL. Autism Diagnostic Observation Schedule: ADOS-2. Los Angeles: Western Psychological Services. 2012.
- [2] Wechsler D. WISC-V-NL. Wechsler Intelligence Scale for Children, Fifth Edition, Dutch version. Amsterdam: Pearson Benelux B.V.; 2018.
- [3] Constantino JN, Gruber CP. Social responsiveness scale (2nd. ed.). Manual. Los Angeles: Western Psychological Services; 2012.
- [4] Roeyers H, Thys M, Druart C, de Schryver M, Schittekatte M. SRS-2: Screeningslijst voor autismespectrumstoornissen. Amsterdam: Hogrefe Uitgevers; 2015.
- [5] Bodfish JW, Symons FJ, Parker DE, Lewis MH. Varieties of repetitive behavior in autism: comparisons to mental retardation. J Autism Dev Disord. 2000;30:237–43.
- [6] Lam KSL, Aman MG. The Repetitive Behavior Scale-Revised: independent validation in individuals with autism spectrum disorders. J Autism Dev Disord. 2007;37:855–66.

[7] Muris P, Bodden D, Hale W, Birmaher B, Mayer B. SCARED-NL. Vragenlijst over angst en bang-zijn bij kinderen en adolescenten. Handleiding bij de gereviseerde Nederlandse versie van de Screen for Child Anxiety Related Emotional Disorders. Amsterdam: Boom Test Uitgevers; 2007.

[8] Finzi R, Cohen O, Sapir Y, Weizman A. Attachment styles in maltreated children: a comparative study. *Child Psychiatry Hum Dev.* 2000;31:113–28.

[9] Bosmans G, van de Walle M, Goossens L, Ceulemans E. (In)variability of attachment in middle childhood: Secure base script evidence in diary data. *Behaviour Change.* 2014;31:225–42.

## Supplementary Table 6

### Mean questionnaire scores for each treatment group and assessment session.

For each questionnaire, raw mean scores and standard deviations are listed separately for each treatment group (oxytocin, placebo) and each assessment session (baseline, post, follow-up) of each phase (phase I and II).

| Outcome Measure                              | Baseline |             |             |          |             |             | Phase I (double-blind)    |             |                          |          |                           |             |                          |             |             |    |       |         |
|----------------------------------------------|----------|-------------|-------------|----------|-------------|-------------|---------------------------|-------------|--------------------------|----------|---------------------------|-------------|--------------------------|-------------|-------------|----|-------|---------|
|                                              | Oxytocin |             |             | Placebo  |             |             | Post                      |             |                          |          | Follow-up                 |             |                          |             |             |    |       |         |
|                                              | N        | Mean        | ± SD        | N        | Mean        | ± SD        | N                         | Mean        | ± SD                     | N        | Mean                      | ± SD        | N                        | Mean        | ± SD        |    |       |         |
| <b>Primary Outcome</b>                       |          |             |             |          |             |             |                           |             |                          |          |                           |             |                          |             |             |    |       |         |
| SRS informant based                          | 38       | 89.26       | ± 21.66     | 39       | 87.87       | ± 20.03     | 38                        | 85.18       | ± 23.56                  | 38       | 83.66                     | ± 21.88     | 38                       | 82.50       | ± 25.58     | 39 | 82.49 | ± 23.88 |
| <b>Secondary Outcomes - informant report</b> |          |             |             |          |             |             |                           |             |                          |          |                           |             |                          |             |             |    |       |         |
| RBS                                          | 38       | 27.29       | ± 15.24     | 39       | 26.64       | ± 16.43     | 38                        | 20.76       | ± 13.27                  | 38       | 19.50                     | ± 14.70     | 38                       | 22.74       | ± 14.19     | 39 | 22.23 | ± 16.71 |
| SCARED Parent                                | 38       | 39.74       | ± 21.74     | 39       | 45.15       | ± 18.31     | 38                        | 39.26       | ± 21.51                  | 38       | 40.16                     | ± 18.31     | 38                       | 36.82       | ± 21.08     | 39 | 39.77 | ± 17.69 |
| <b>Secondary Outcomes - self report</b>      |          |             |             |          |             |             |                           |             |                          |          |                           |             |                          |             |             |    |       |         |
| SCARED Child                                 | 38       | 38.29       | ± 20.99     | 39       | 39.05       | ± 20.21     | 38                        | 33.55       | ± 20.67                  | 39       | 35.67                     | ± 21.18     | 38                       | 32.32       | ± 20.57     | 39 | 32.69 | ± 17.85 |
| ASCQ Secure                                  | 38       | 19.97       | ± 3.50      | 39       | 19.23       | ± 2.78      | 38                        | 19.08       | ± 3.24                   | 39       | 18.31                     | ± 3.42      | 38                       | 18.61       | ± 3.38      | 39 | 18.41 | ± 3.75  |
| ASCQ Anxious                                 | 38       | 13.45       | ± 5.19      | 39       | 12.85       | ± 4.15      | 38                        | 12.53       | ± 5.00                   | 39       | 11.85                     | ± 3.80      | 38                       | 12.45       | ± 5.06      | 39 | 10.46 | ± 3.42  |
| ASCQ Avoidant                                | 38       | 13.79       | ± 4.00      | 39       | 14.08       | ± 3.86      | 38                        | 13.50       | ± 3.91                   | 39       | 13.00                     | ± 4.01      | 38                       | 12.95       | ± 4.38      | 39 | 12.62 | ± 3.81  |
| Attachment Mother Anxiety                    | 38       | 4.74        | ± 2.89      | 39       | 4.82        | ± 2.78      | 38                        | 5.50        | ± 2.68                   | 39       | 4.49                      | ± 2.02      | 38                       | 5.58        | ± 2.90      | 39 | 4.90  | ± 2.33  |
| Attachment Mother Avoidance                  | 38       | 9.05        | ± 4.76      | 39       | 7.97        | ± 4.03      | 38                        | 8.84        | ± 5.01                   | 39       | 7.15                      | ± 2.80      | 38                       | 8.45        | ± 4.72      | 39 | 7.31  | ± 3.29  |
| Attachment Mother Secure                     | 38       | 16.76       | ± 4.24      | 39       | 17.87       | ± 3.13      | 38                        | 17.00       | ± 3.57                   | 39       | 17.69                     | ± 3.37      | 38                       | 17.42       | ± 3.55      | 39 | 18.00 | ± 2.93  |
|                                              |          |             |             |          |             |             | Phase II (single-blind)   |             |                          |          |                           |             |                          |             |             |    |       |         |
|                                              |          |             |             |          |             |             | Post                      |             |                          |          | Follow-up                 |             |                          |             |             |    |       |         |
|                                              |          |             |             |          |             |             | Oxytocin <sub>first</sub> |             | Placebo <sub>first</sub> |          | Oxytocin <sub>first</sub> |             | Placebo <sub>first</sub> |             |             |    |       |         |
| <b>Outcome Measure</b>                       | <b>N</b> | <b>Mean</b> | <b>± SD</b> | <b>N</b> | <b>Mean</b> | <b>± SD</b> | <b>N</b>                  | <b>Mean</b> | <b>± SD</b>              | <b>N</b> | <b>Mean</b>               | <b>± SD</b> | <b>N</b>                 | <b>Mean</b> | <b>± SD</b> |    |       |         |
| <b>Primary Outcome</b>                       |          |             |             |          |             |             |                           |             |                          |          |                           |             |                          |             |             |    |       |         |
| SRS informant based                          | 37       | 83.81       | ± 25.14     | 38       | 77.37       | ± 22.75     | 36                        | 79.22       | ± 24.28                  | 36       | 78.14                     | ± 23.78     |                          |             |             |    |       |         |
| <b>Secondary Outcomes - informant report</b> |          |             |             |          |             |             |                           |             |                          |          |                           |             |                          |             |             |    |       |         |
| RBS                                          | 37       | 20.57       | ± 16.51     | 38       | 19.13       | ± 16.66     | 36                        | 19.58       | ± 15.55                  | 36       | 17.08                     | ± 12.76     |                          |             |             |    |       |         |
| SCARED Parent                                | 37       | 37.43       | ± 22.57     | 38       | 37.92       | ± 18.96     | 36                        | 33.81       | ± 21.88                  | 36       | 35.75                     | ± 17.17     |                          |             |             |    |       |         |
| <b>Secondary Outcomes - self report</b>      |          |             |             |          |             |             |                           |             |                          |          |                           |             |                          |             |             |    |       |         |
| SCARED Child                                 | 37       | 30.38       | ± 20.47     | 39       | 31.82       | ± 21.14     | 36                        | 29.58       | ± 20.36                  | 37       | 29.19                     | ± 17.30     |                          |             |             |    |       |         |
| ASCQ Secure                                  | 37       | 18.32       | ± 3.51      | 39       | 18.41       | ± 3.85      | 36                        | 18.19       | ± 2.81                   | 37       | 18.19                     | ± 3.41      |                          |             |             |    |       |         |
| ASCQ Anxious                                 | 37       | 12.24       | ± 5.36      | 39       | 10.41       | ± 3.75      | 36                        | 11.83       | ± 4.83                   | 37       | 10.89                     | ± 4.21      |                          |             |             |    |       |         |
| ASCQ Avoidant                                | 37       | 12.46       | ± 3.58      | 39       | 12.77       | ± 4.21      | 36                        | 12.64       | ± 3.94                   | 37       | 13.24                     | ± 3.95      |                          |             |             |    |       |         |
| Attachment Mother Anxiety                    | 37       | 5.70        | ± 3.61      | 39       | 5.13        | ± 3.29      | 36                        | 5.72        | ± 4.03                   | 37       | 5.00                      | ± 2.99      |                          |             |             |    |       |         |
| Attachment Mother Avoidance                  | 37       | 8.30        | ± 5.06      | 39       | 6.85        | ± 3.34      | 36                        | 7.94        | ± 5.23                   | 37       | 7.16                      | ± 3.38      |                          |             |             |    |       |         |
| Attachment Mother Secure                     | 37       | 16.97       | ± 3.37      | 39       | 17.03       | ± 4.20      | 36                        | 17.14       | ± 4.43                   | 37       | 17.46                     | ± 3.12      |                          |             |             |    |       |         |

SRS Social Responsiveness Scale, RBS-R Repetitive Behavior Scale-Revised, SCARED Screen for Child Anxiety Related Disorders, ASCQ Attachment Style Classification Questionnaire.



## Supplementary Table 7

### Effects of oxytocin nasal spray administration on primary and secondary outcome measures of the single-blind phase II.

Changes from assessment session T2 (last session of phase I) are listed separately for the post assessment session (immediately after the four-week oxytocin nasal spray administration period, T3) and the follow-up assessment (four weeks after cessation of the nasal spray administration period, T4).

| Outcome measure                           | Within-group         |               |                 |                 |          |                     |                 |                 |       |       | Between-group    |                 |                 |
|-------------------------------------------|----------------------|---------------|-----------------|-----------------|----------|---------------------|-----------------|-----------------|-------|-------|------------------|-----------------|-----------------|
|                                           | Oxytocin-first group |               |                 |                 |          | Placebo-first group |                 |                 |       |       | Cohen's <i>d</i> | <i>t</i> -value | <i>p</i> -value |
|                                           | <i>n</i>             | mean ± SD     | <i>t</i> -value | <i>p</i> -value | <i>n</i> | mean ± SD           | <i>t</i> -value | <i>p</i> -value |       |       |                  |                 |                 |
| <b>T3 Post assessment</b>                 |                      |               |                 |                 |          |                     |                 |                 |       |       |                  |                 |                 |
| <b>Primary Outcome</b>                    |                      |               |                 |                 |          |                     |                 |                 |       |       |                  |                 |                 |
| SRS-2 total raw score                     | 37                   | 1.41 ± 9.91   | 0.86            | 0.394           | 38       | -5.24 ± 9.87        | -3.27           | <b>0.002</b>    | 0.67  | 2.91  | <b>0.005</b>     |                 |                 |
| <b>Secondary Outcomes - parent report</b> |                      |               |                 |                 |          |                     |                 |                 |       |       |                  |                 |                 |
| RBS-R                                     | 37                   | -1.76 ± 8.68  | -1.23           | 0.226           | 38       | -2.89 ± 4.52        | -3.94           | <b>0.000</b>    | 0.17  | 0.71  | 0.477            |                 |                 |
| SCARED Parent                             | 37                   | 0.27 ± 7.31   | 0.22            | 0.823           | 38       | -1.53 ± 5.87        | -1.60           | 0.117           | 0.27  | 1.18  | 0.244            |                 |                 |
| <b>Secondary Outcomes - self report</b>   |                      |               |                 |                 |          |                     |                 |                 |       |       |                  |                 |                 |
| SCARED Child                              | 37                   | -2.76 ± 10.53 | -1.59           | 0.120           | 39       | -0.87 ± 11.78       | -0.46           | 0.647           | -0.17 | -0.73 | 0.465            |                 |                 |
| ASCQ Secure                               | 37                   | -0.22 ± 4.06  | -0.32           | 0.748           | 39       | 0.00 ± 2.14         | 0.00            | 1.000           | -0.07 | -0.29 | 0.771            |                 |                 |
| ASCQ Anxious                              | 37                   | -0.38 ± 3.53  | -0.65           | 0.519           | 39       | -0.05 ± 2.90        | -0.11           | 0.913           | -0.10 | -0.44 | 0.660            |                 |                 |
| ASCQ Avoidant                             | 37                   | -0.70 ± 3.40  | -1.26           | 0.217           | 39       | 0.15 ± 2.82         | 0.34            | 0.736           | -0.27 | -1.20 | 0.235            |                 |                 |
| Attachment Mother Anxiety                 | 37                   | 0.08 ± 3.06   | 0.16            | 0.873           | 39       | 0.23 ± 2.64         | 0.55            | 0.588           | -0.05 | -0.23 | 0.820            |                 |                 |
| Attachment Mother Avoidance               | 37                   | -0.30 ± 3.13  | -0.58           | 0.566           | 39       | -0.46 ± 2.27        | -1.27           | 0.212           | 0.06  | 0.26  | 0.793            |                 |                 |
| Attachment Mother Secure                  | 37                   | -0.35 ± 3.23  | -0.66           | 0.513           | 39       | -0.97 ± 3.38        | -1.80           | 0.080           | 0.19  | 0.82  | 0.415            |                 |                 |
| <b>T4 Follow-up assessment</b>            |                      |               |                 |                 |          |                     |                 |                 |       |       |                  |                 |                 |
| <b>Primary Outcome</b>                    |                      |               |                 |                 |          |                     |                 |                 |       |       |                  |                 |                 |
| SRS-2 total raw score                     | 36                   | -2.94 ± 11.09 | -1.59           | 0.120           | 36       | -3.53 ± 9.11        | -2.32           | <b>0.026</b>    | 0.06  | 0.24  | 0.808            |                 |                 |
| <b>Secondary Outcomes - parent report</b> |                      |               |                 |                 |          |                     |                 |                 |       |       |                  |                 |                 |
| RBS-R                                     | 36                   | -2.75 ± 9.10  | -1.81           | 0.078           | 36       | -3.19 ± 7.19        | -2.67           | <b>0.012</b>    | 0.05  | 0.23  | 0.819            |                 |                 |
| SCARED Parent                             | 36                   | -2.17 ± 9.62  | -1.35           | 0.185           | 36       | -1.89 ± 8.30        | -1.36           | 0.181           | -0.03 | -0.13 | 0.896            |                 |                 |
| <b>Secondary Outcomes - self report</b>   |                      |               |                 |                 |          |                     |                 |                 |       |       |                  |                 |                 |
| SCARED Child                              | 36                   | -4.03 ± 13.36 | -1.81           | 0.079           | 37       | -4.51 ± 11.22       | -2.45           | <b>0.019</b>    | 0.04  | 0.17  | 0.867            |                 |                 |
| ASCQ Anxious                              | 36                   | -0.39 ± 3.41  | -0.68           | 0.498           | 37       | -0.41 ± 2.51        | -0.98           | 0.333           | 0.01  | 0.02  | 0.981            |                 |                 |
| ASCQ Avoidant                             | 36                   | -0.53 ± 2.44  | -1.30           | 0.203           | 37       | 0.32 ± 3.21         | 0.62            | 0.542           | -0.30 | -1.27 | 0.207            |                 |                 |
| ASCQ Secure                               | 36                   | -0.36 ± 3.30  | -0.66           | 0.516           | 37       | 0.65 ± 3.31         | 1.19            | 0.241           | -0.31 | -1.30 | 0.196            |                 |                 |

|                             |    |              |       |       |    |              |       |       |       |       |       |
|-----------------------------|----|--------------|-------|-------|----|--------------|-------|-------|-------|-------|-------|
| Attachment Mother Anxiety   | 36 | 0.11 ± 3.87  | 0.17  | 0.864 | 37 | 0.00 ± 2.95  | 0.00  | 1.000 | 0.03  | 0.14  | 0.890 |
| Attachment Mother Avoidance | 36 | -0.53 ± 3.14 | -1.01 | 0.320 | 37 | -0.19 ± 2.75 | -0.42 | 0.678 | -0.11 | -0.49 | 0.625 |
| Attachment Mother Secure    | 36 | -0.22 ± 2.70 | -0.49 | 0.624 | 37 | -0.43 ± 2.61 | -1.01 | 0.320 | 0.08  | 0.34  | 0.736 |

SRS-2: Social Responsiveness Scale, RBS-R: Repetitive Behavior Scale-Revised, SCARED: Screen for Child Anxiety Related Disorders, ASCQ: Attachment Style Classification Questionnaire. For all outcomes, except ASCQ secure and Attachment mother secure, negative change from baseline scores indicate pre-to-post improvement. Values printed in bold indicate p-values < 0.05.
